# Supplementary material for: Silencing Dicer-Like Genes Reduces Virulence and sRNA Generation in Penicillium italicum, the Cause of Citrus Blue Mold
Source: MDPI journal article supplement (doi:10.3390/cells9020363), 2020-02-04
Supplement: s1 [file s1]

Supplementary Figure S1

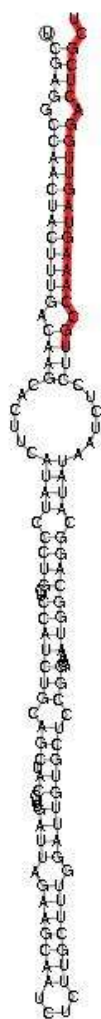

The secondary structure of precursor of Pi-novel1

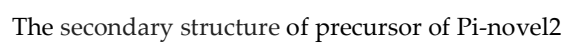



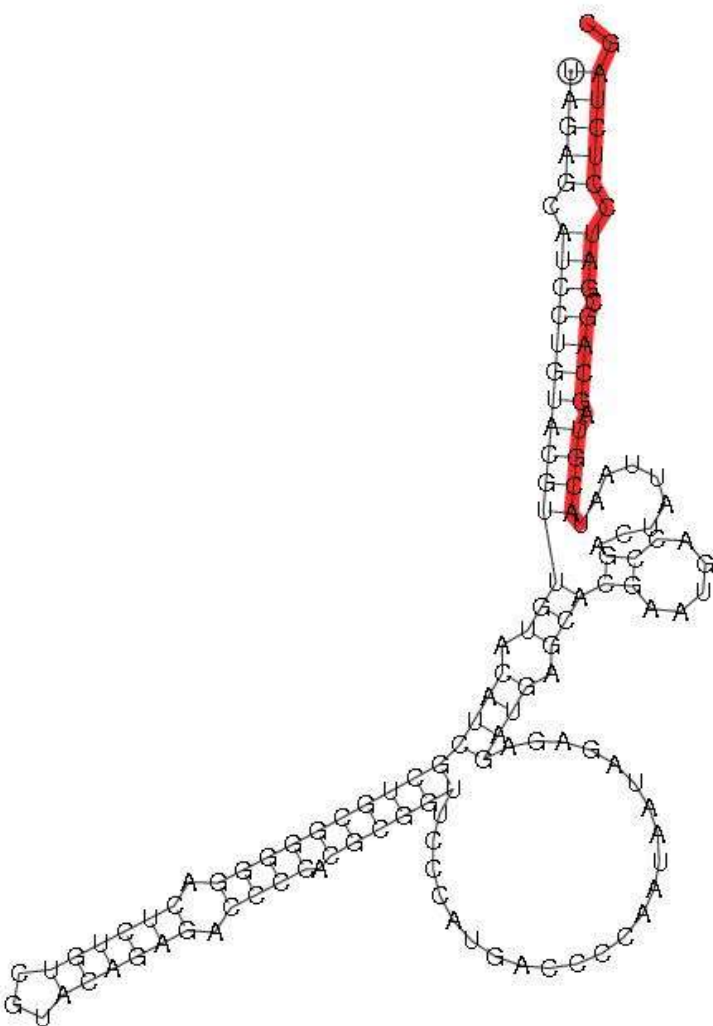

The secondary structure of precursor of Pi-novel6

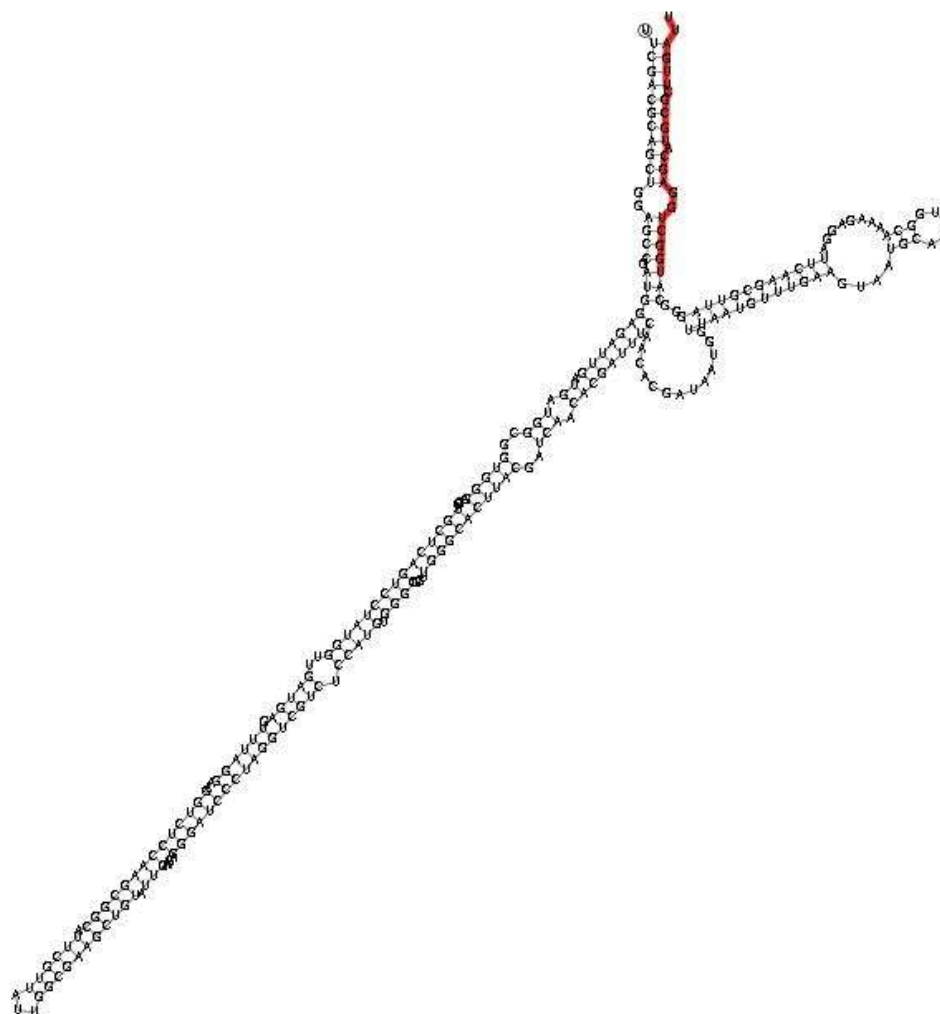

The secondary structure of precursor of Pi-novel7

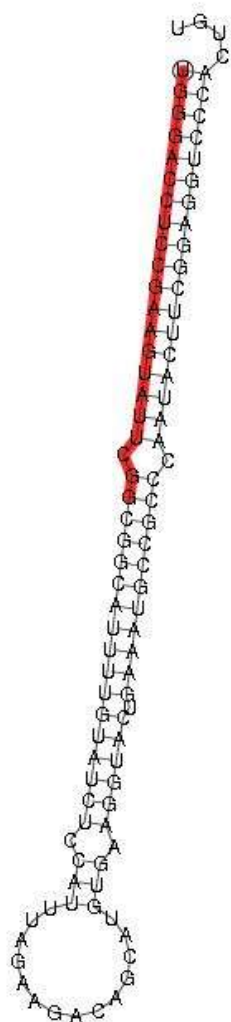

The secondary structure of precursor of Pi-novel10

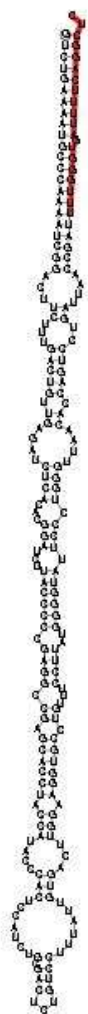

The secondary structure of precursor of Pi-novel11

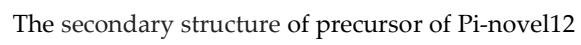



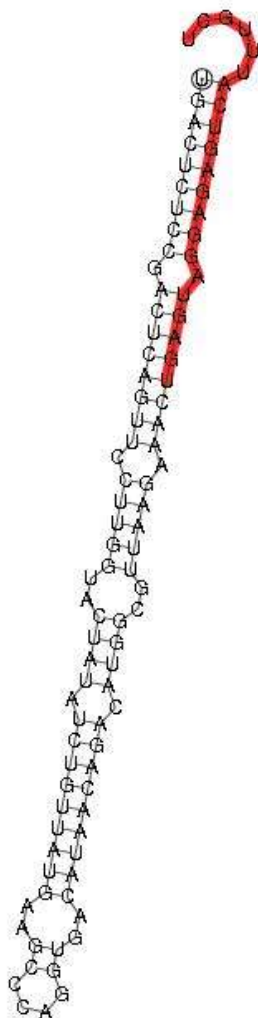

The secondary structure of precursor of Pi-novel14

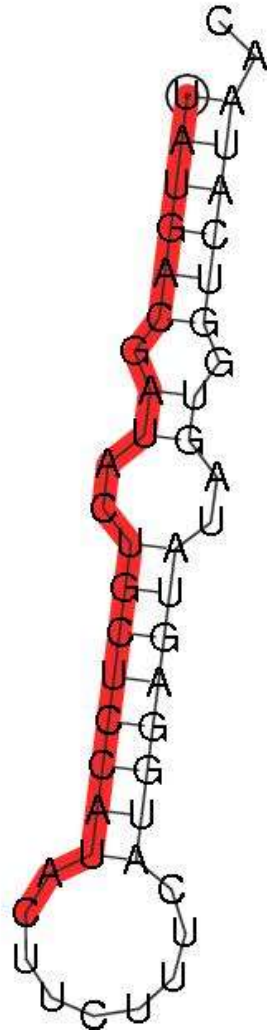

The secondary structure of precursor of Pi-novel16



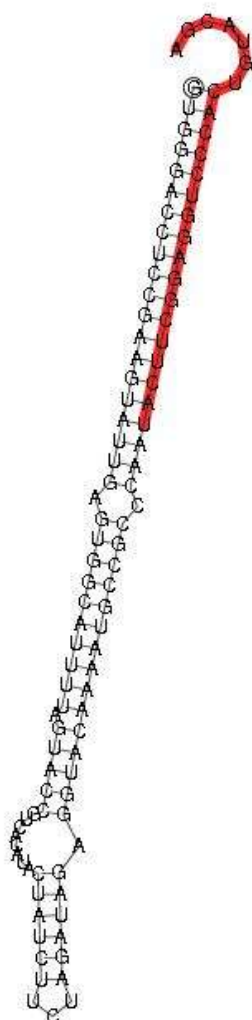

The secondary structure of precursor of Pi-novel24
