# Supplementary material for: Silencing Dicer-Like Genes Reduces Virulence and sRNA Generation in Penicillium italicum, the Cause of Citrus Blue Mold
Source: MDPI journal article supplement (doi:10.3390/cells9020363), 2020-02-04
Supplement: s1 [file s1]

Table S1 Primer sequences used in this study

| Primers                          | Sequences                                      |
|----------------------------------|------------------------------------------------|
| QDCL1-F                          | 5' AAAACTGCAACTGAACTGAAGCTA 3'                 |
| QDCL1-R                          | 5' TTTCGGCTAAGGGGTGCTT 3'                      |
| QDCL2-F                          | 5' CATGGTCGTCATGGCAGTTATCGC 3'                 |
| QDCL2-R                          | 5' CGTGGGAAGGCTCATCTGGTGC 3'                   |
| hph-F                            | 5' CGGAGACGCTGTGCAACTTT 3'                     |
| hph-R                            | 5' GCTATGACCATGATTACGCCAA 3'                   |
| plus strand<br>DCL1-F (XhoI)     | 5' GATACCGTCGACCTCGAGCCTCAACCGTTGGTTATA 3'     |
| plus strand<br>DCL1-R (HindIII)  | 5' GTATCCTCCAGCAAGCTTCCATACTCAAGCGAAAGA 3'     |
| minus strand<br>DCL1-F (KpnI)    | 5' GCTAAGGCCTGTGGTACCCCATACTCAAGCGAAAGA 3'     |
| minus strand<br>DCL1-R (ApaI)    | 5' TAAGTGGATCCGGGGCCCCTCAACCGTTGGTTATA 3'      |
| plus strand<br>DCL2- F (XhoI)    | 5' GATACCGTCGACCTCGAGCTTGGCAGATGTTGTGGA 3'     |
| plus strand<br>DCL2- R (HindIII) | 5' GTATCCTCCAGCAAGCTTCAGGAGGTTAGCATTGACG 3'    |
| minus strand<br>DCL2-F (KpnI)    | 5' GCTAAGGCCTGTGGTACCCAGGAGGTTAGCATTGACG 3'    |
| minus strand<br>DCL2- R (ApaI)   | 5' TAAGTGGATCCGGGGCCCCTTGGCAGATGTTGTGGA 3'     |
| Pit-DCL2-F                       | 5' TAATACGACTCACTATAGGGCTTGGCAGATGTTGTGGA 3'   |
| Pit-DCL2-R                       | 5' TAATACGACTCACTATAGGGCAGGAGGTTAGCATTGACG 3'  |
| Pit-GFP-F                        | 5' TAATACGACTCACTATAGGGGCGACGTAAACGGCCACA 3'   |
| Pit-GFP-R                        | 5' TAATACGACTCACTATAGGGCGAACTCCAGCAGGACCATG 3' |
| novel2-F                         | 5' AATCAAGCGCATGCTCCAGCCATGC 3'                |

|           |                                                 |
|-----------|-------------------------------------------------|
| novel2-R  | 5' TTCGACGCAGCTGGAGCCGATGGAG 3'                 |
| novel6-F  | 5' GCTAGAGGATCGCTGCTACGTATTA 3'                 |
| novel6-R  | 5' TAGAGCATCCTGTACGTTGTACATC 3'                 |
| novel7-F  | 5' AATCAAGCGCATGCTCCAGCCATGC 3'                 |
| novel7-R  | 5' TTCGACGCAGCTGGAGCCGATGGAG 3'                 |
| novel11-F | 5' GAGCCTGAAAATCACCCAAAA 3'                     |
| novel11-R | 5' GTCTGAAAATGCCCAAAATCGGACT 3'                 |
| novel14-F | 5' AGCAAATGACTCTCCTACTCAGTTT 3'                 |
| novel14-R | 5' TGACTCTCCGACTCAGTTCCTTGGT 3'                 |
| U6        | 5' TGTCACTCCTTGCGCAGGGGCCATGCTAATCTTCTCTGTAT 3' |
| novel7    | 5' AATCAAGCGCATGCTCCAGCCA 3'                    |
| Actin-F   | 5' GCACGGAAGACCTGGATT 3'                        |
| Actin-R   | 5' GGTTCCGGTGAGTAGGAAGTAG 3'                    |

Note: The revised primers (QDCL1-R and QDCL2-R) were designed out of the dsDCL region to avoid the amplification of the exogenous dsDCL constructs in the qRT-PCR analysis.
