# Supplementary material for: Silencing Dicer-Like Genes Reduces Virulence and sRNA Generation in Penicillium italicum, the Cause of Citrus Blue Mold
Source: Cells. 2020 Feb 4;9(2):363. doi: 10.3390/cells9020363 (PMC7072147; doi:10.3390/cells9020363)
Supplement: Supplementary file 1 [file cells-09-00363-s001.zip]

Archive with 4 entries (4 files):
- Figure supplementary file 1 copy.pdf
- Table supplementary file 1 copy.pdf
- Table supplementary file 2.xls
- Table supplementary file 3.xls
