# Supplementary material for: Silencing Dicer-Like Genes Reduces Virulence and sRNA Generation in Penicillium italicum, the Cause of Citrus Blue Mold
Source: Cells. 2020 Feb 4;9(2):363. doi: 10.3390/cells9020363 (PMC7072147; doi:10.3390/cells9020363)
Supplement: Supplementary file 1 [file cells-09-00363-s001.zip › Table supplementary file 2.xls]

## Sheet: total_uniq
Library	total_reads	clean reads	Total sRNA No.	Total sRNA bases (bp)	Unique sRNA No.	Unique sRNA bases (bp)
CK1	11151754	10895550 (97.70%)	7667355	186976291	807518	18449790
CK2	12899120	12572561 (97.47%)	7799346	193870904	815695	18958235
CK3	13269936	10705581 (80.68%)	3548359	95616124	315534	7705094
DCL1RNA1	10883742	10634067 (97.71%)	7317650	175190936	644897	15284080
DCL1RNA2	13962514	13690299 (98.05%)	9679013	220126831	853365	19506365
DCL1RNA3	13593297	13377485 (98.41%)	10456195	233902101	832673	18760120
DCL2RNA1	12669830	12175933 (96.10%)	6270492	160009479	551572	13625207
DCL2RNA2	11925667	11715368 (98.24%)	7383846	185405287	600986	14550566
DCL2RNA3	15414180	15007476 (97.36%)	9761144	224844917	850745	19543807
