# Supplementary material for: Silencing Dicer-Like Genes Reduces Virulence and sRNA Generation in Penicillium italicum, the Cause of Citrus Blue Mold
Source: Cells. 2020 Feb 4;9(2):363. doi: 10.3390/cells9020363 (PMC7072147; doi:10.3390/cells9020363)
Supplement: Supplementary file 1 [file cells-09-00363-s001.zip › Table supplementary file 3.xls]

## Sheet: known_hairpin_mature
precursor_id	precursor_seq	mfe	position	mature_id	mature_seq
ath-MIR159a	GUAGAGCUCCUUAAAGUUCAAACAUGAGUUGAGCAGGGUAAAGAAAAGCUGCUAAGCUAUGGAUCCCAUAAGCCCUAAUCCUUGUAAAGUAAAAAAGGAUUUGGUUAUAUGGAUUGCAUAUCUCAGGAGCUUUAACUUGCCCUUUAAUGGCUUUUACUCUUCUUUGGAUUGAAGGGAGCUCUAC	--	--	ath-miR159a	UUUGGAUUGAAGGGAGCUCUA
ath-MIR159b	GGAAGAGCUCCUUGAAGUUCAAUGGAGGGUUUAGCAGGGUGAAGUAAAGCUGCUAAGCUAUGGAUCCCAUAAGCCUUAUCAAAUUCAAUAUAAUUGAUGAUAAGGUUUUUUUUAUGGAUGCCAUAUCUCAGGAGCUUUCACUUACCCCUUUAAUGGCUUCACUCUUCUUUGGAUUGAAGGGAGCUCUUCAUCUCUC	--	--	ath-miR159b-3p	UUUGGAUUGAAGGGAGCUCUU
ath-MIR159c	GUGUAACAGAAGGAGCUCCCUUCCUCCAAAACGAAGAGGACAAGAUUUGAGGAACUAAAAUGCAGAAUCUAAGAGUUCAUGUCUUCCUCAUAGAGAGUGCGCGGUGUUAAAAGCUUGAAGAAAGCACACUUUAAGGGGAUUGCACGACCUCUUAGAUUCUCCCUCUUUCUCUACAUAUCAUUCUCUUCUCUUCGUUUGGAUUGAAGGGAGCUCCUUUUCUUCUUC	--	--	ath-miR159c	UUUGGAUUGAAGGGAGCUCCU
ath-MIR396a	CUCUGUAUUCUUCCACAGCUUUCUUGAACUGCAAAACUUCUUCAGAUUUUUUUUUUUUUCUUUUGAUAUCUCUUACGCAUAAAAUAGUGAUUUUCUUCAUAUCUCUGCUCGAUUGAUUUGCGGUUCAAUAAAGCUGUGGGAAGAUACAGAC	--	--	ath-miR396a-5p	UUCCACAGCUUUCUUGAACUG
ath-MIR396b	GGUCAUACUUUUCCACAGCUUUCUUGAACUUUCUUUUUCAUUUCCAUUGUUUUUUUCUUAAACAAAAGUAAGAAGAAAAAAAACUUUAAGAUUAAGCAUUUUGGAAGCUCAAGAAAGCUGUGGGAAAACAUGACA	--	--	ath-miR396b-5p	UUCCACAGCUUUCUUGAACUU
gma-MIR396h	GAAUGGUCUUUUUCGUGAUCUUCCACAGCUUUCUUGAACUGUGUUGUGUGAGGUUUCUCCAAGUGAAGGUUUAAGAUCCCUUAUGCAACAUAAAUUCUUUGAGCACAAUUCAAGAUAGCUGUGGAAAAUCACUGAGAUGAUCUCGUUC	--	--	gma-miR396h	UCCACAGCUUUCUUGAACUG
lus-MIR159b	AAGAGAGCUCCUUUGGGUCCAAACAGAGGGUGUGGAUAGGGUGAGAUGGAAGCUGCUGAGCUAUGGAUUCCACAACCCCACCCUUUUGAUUAUUGAUCCGGUGGGUUGUGGCUCGUUUUGCAUAUCUCAGGAGCCUCCGUUCCCUGUUUUCUUCUCUUCCCUCCUUUGGAUUGAAGGGAGCUCUCUU	--	--	lus-miR159b	UUUGGAUUGAAGGGAGCUCUC
mdm-MIR396a	GAUCCUCUUUGUAUUCUUCCACAGCUUUCUUGAACAGCAUCCAUGUAUGACGAGAUCGACCGAUCUUUGGAGUGAGUCGACUCAGUCUCUCUAUUCCUCUUAACUUGGUUUGCGGUUCAAUAAAGCUGUGGGAAGAUACAGAUAGGCUC	--	--	mdm-miR396a	UUCCACAGCUUUCUUGAACAG
mes-MIR482	GGAGAAAAAGCAAGGAUUUUCGGAAGGUUAUGAGAUGGGUAAGUGGGGAAGAUAACUGUGGGGCUUUCGUUUUGUUUGUUAUCUUCCCUACUCCACCCAUUCCAUAGCUUUCCGAUCGUUCCUCUCUCUCC	--	--	mes-miR482	UCUUCCCUACUCCACCCAUUCC
osa-MIR159a	GUUGUGGACGUUGAGCUCCUUUCGGUCCAAAAAGGGGUGUUGCUGUGGGUCGAUUGAGCUGCUGGGUCAUGGAUCCCGUUAGCCUACUCCAUGUUCAUCAUUCAGCUCGAGAUCUGAAAGAAACUACUCCAAUUUAUACUAAUAGUAUGUGUGUAGAUAGGAAAAUGAUGGAGUACUCGUUGUUGGGAUAGGCUUAUGGCUUGCAUGCCCCAGGAGCUGCAUCAACCCUACAUGGACCCUCUUUGGAUUGAAGGGAGCUCUGCAUCUUUUGU	--	--	osa-miR159a.1	UUUGGAUUGAAGGGAGCUCUG
osa-MIR530	GUGAUAGAGCUGCAUUUGCACCUGCACCUACAGAGAGGAAGAUGAAGCAGCAAGCUAGCAAUACGUGCUUGAUCGCUAUACGCUAGCUUCUUGCACACAAUGUUGUUCCUGGUCUCUUCCUGAUCCCUAGGUGCAGAGGCAGAUGCAACUAUGUCAU	--	--	osa-miR530-3p	AGGUGCAGAGGCAGAUGCAAC
ppe-MIR396a	UUCCACAGCUUUCUUGAACGUCUGUGCCCUUUCAGGAACUAUCAGAUAAUUUUCAUGCAGUUCCAAUAGCACAAAAACAGUUCAAGAAAGCUGUGAAA	--	--	ppe-miR396a	UUCCACAGCUUUCUUGAACGU
vvi-MIR396a	UCCUGUCAUGCUUUUCCACAGCUUUCUUGAACUACUUUUCCAUCUACCUGUUUGAUGAUCUUCUUCAUAAGGAGUGUGAAAUAGAAGCUCAAGAAAGCUGUGGGAGGACAUGGCAA	--	--	vvi-miR396a	UUCCACAGCUUUCUUGAACUA
vvi-MIR396b	UCCUGCCAUGCUUUUCCACAGCUUUCUUGAACUUCUUCUCCCUGUUUGGUGGUCUCCUACGUUUACCCAUCCACUGAAGUUCAAGAAAGCUGUGGGAAACCAUGGCUU	--	--	vvi-miR396b	UUCCACAGCUUUCUUGAACU
zma-MIR396g	UUCCCACAGCUUUAUUGAACUGCCCUCUUGCUUGCUUGGAUCAAUUGAAACUCGAUCAGGUCCACAGCACAGCCUGCUGCAUGCAUGAUGCAGUUCAAGAAAGCUGUGGAAGAU	--	--	zma-miR396g-3p	GUUCAAGAAAGCUGUGGAAGA
